# Supplementary material for: Advanced Chemophenetic Analysis of Essential Oil from Leaves of Piper gaudichaudianum Kunth (Piperaceae) Using a New Reduction-Oxidation Index to Explore Seasonal and Circadian Rhythms
Source: MDPI journal article supplement (doi:10.3390/plants10102116), 2021-10-06
Supplement: s1 [file s1]

## Supplementary Material

**Table S1.** Simple correlation between the main constituents of the essential oils from leaves of *Piper gaudichaudianum* Kunth collected for seasonality study.

| Compound                      | $\alpha$ -Cadinol | Bicyclogermacrene | <i>E</i> -Nerolidol | <i>E</i> -Caryophyllene | Eudesmadiene | Non-oxygenated Monoterpene | Oxygenated monoterpenes | Non-oxygenated Sesquiterpenes | Oxygenated sesquiterpenes |
|-------------------------------|-------------------|-------------------|---------------------|-------------------------|--------------|----------------------------|-------------------------|-------------------------------|---------------------------|
| Bicyclogermacrene             | -0.269            |                   |                     |                         |              |                            |                         |                               |                           |
| ( <i>E</i> )-Nerolidol        | -0.508            | -0.192            |                     |                         |              |                            |                         |                               |                           |
| <i>E</i> -Caryophyllene       | 0.294             | 0.340             | -0.454              |                         |              |                            |                         |                               |                           |
| Eudesmadiene                  | 0.396             | 0.125             | -0.746*             | 0.635*                  |              |                            |                         |                               |                           |
| Non-oxygenated Monoterpene    | -0.536            | -0.057            | 0.457               | -0.036                  | -0.278       |                            |                         |                               |                           |
| Oxygenated monoterpenes       | -0.402            | 0.152             | -0.111              | -0.115                  | 0.179        | 0.6137*                    |                         |                               |                           |
| Non-oxygenated Sesquiterpenes | 0.318             | 0.353             | -0.540              | 0.571                   | 0.453        | -0.653*                    | -0.380                  |                               |                           |
| Oxygenated sesquiterpenes     | -0.066            | -0.532            | 0.679*              | -0.598*                 | -0.644*      | 0.350                      | -0.165                  | -0.828**                      |                           |
| Other compounds               | -0.515            | 0.330             | 0.391               | -0.492                  | -0.632*      | -0.160                     | -0.268                  | -0.026                        | 0.145                     |

\*Significant at  $p < 0.05$  \*\*Significant at  $p < 0.01$

**Tabela S2.** Simple correlation between the main constituents of the essential oils from leaves of *Piper gaudichaudianum* Kunth collected for the circadian rhythm study.

| Rainy Season (March)         |                         |                               |                           |                   |              |                         |                   |             |
|------------------------------|-------------------------|-------------------------------|---------------------------|-------------------|--------------|-------------------------|-------------------|-------------|
| Compound                     | Oxygenated monoterpenes | Non-oxygenated Sesquiterpenes | Oxygenated sesquiterpenes | Bicyclogermacrene | Eudesmadiene | <i>E</i> -Caryophyllene | $\alpha$ -Cadinol | Spathulenol |
| Non-oxygenated Sesquiterpene | 0.366                   |                               |                           |                   |              |                         |                   |             |
| Oxygenated sesquiterpenes    | -0.582                  | -0.854*                       |                           |                   |              |                         |                   |             |
| Bicyclogermacrene            | 0.698                   | 0.594                         | -0.870*                   |                   |              |                         |                   |             |
| Eudesmadiene                 | -0.798*                 | -0.554                        | 0.843*                    | -0.963**          |              |                         |                   |             |
| <i>E</i> -Caryophyllene      | 0.723*                  | 0.800*                        | -0.850*                   | 0.774*            | -0.810*      |                         |                   |             |
| $\alpha$ -Cadinol            | -0.808*                 | -0.536                        | 0.836*                    | -0.981**          | 0.980**      | -0.806*                 |                   |             |
| Spathulenol                  | -0.531                  | -0.654                        | 0.906**                   | -0.817*           | 0.843*       | -0.656                  | 0.787*            |             |
| <i>E</i> -Nerolidol          | 0.736*                  | 0.277                         | -0.646                    | 0.907*            | -0.946**     | 0.628                   | -0.932**          | -0.716*     |
| Dry Season (October)         |                         |                               |                           |                   |              |                         |                   |             |
| Compound                     | Oxygenated monoterpenes | Non-oxygenated Sesquiterpenes | Oxygenated sesquiterpenes | Bicyclogermacrene | Eudesmadiene | <i>E</i> -Caryophyllene | $\alpha$ -Cadinol | Spathulenol |
| Non-oxygenated Sesquiterpene | 0.168                   |                               |                           |                   |              |                         |                   |             |
| Oxygenated sesquiterpenes    | -0.381                  | -0.954**                      |                           |                   |              |                         |                   |             |
| Bicyclogermacrene (%)        | 0.524                   | 0.818*                        | -0.850**                  |                   |              |                         |                   |             |
| Eudesmadiene (%)             | -0.446                  | -0.843*                       | 0.822*                    | -0.812*           |              |                         |                   |             |
| <i>E</i> -Caryophyllene (%)  | -0.360                  | 0.744*                        | -0.610                    | 0.337             | -0.495       |                         |                   |             |
| $\alpha$ -Cadinol            | -0.413                  | -0.857*                       | 0.923**                   | -0.795*           | 0.680        | -0.463                  |                   |             |
| Spathulenol                  | -0.271                  | -0.926**                      | 0.851*                    | -0.842*           | 0.944**      | -0.673                  | 0.723*            |             |
| <i>E</i> -Nerolidol          | 0.211                   | 0.898**                       | -0.806*                   | 0.861**           | -0.823**     | 0.584                   | -0.797*           | -0.932**    |

\* Significant  $p < 0.05$  \*\* Significant  $p < 0.01$

**Table S3.** Database of literature on compounds and carbon skeletons of *Piper gaudichaudianum* Kunth leaves' essential oils used to determine chemophenetic variations.

[illegible]

|                 |                                                   |       |      |      |      |      |      |      |      |      |      |      |      |      |      |      |      |
|-----------------|---------------------------------------------------|-------|------|------|------|------|------|------|------|------|------|------|------|------|------|------|------|
| C-Skeleton      | Oxygenated monoterpenes                           | 0.0   | 0.0  | 0.0  | 0.0  | 0.0  | 0.0  | 0.0  | 0.0  | 0.0  | 0.0  | 0.0  | 0.0  | 0.0  | 0.0  | 0.0  | 0.0  |
|                 | Non-oxygenated Sesquiterpenes                     | 48.2  | 30.8 | 31.1 | 29.1 | 36.4 | 24.9 | 25.7 | 22.4 | 29.7 | 23.7 | 29.9 | 24.3 | 31.3 | 24.1 | 24.8 | 25.6 |
|                 | Oxygenated sesquiterpenes                         | 40.1  | 1.7  | 1.5  | 0.0  | 1.8  | 0.9  | 5.1  | 0.2  | 2.6  | 2.1  | 1.2  | 4.9  | 2.9  | 3.3  | 1.8  | 1.3  |
|                 | Arylpropanoids (C <sub>6</sub> -C <sub>3</sub> )  | 0.0   | 63.6 | 63.4 | 66.7 | 57.8 | 68.4 | 62.7 | 70.5 | 60.5 | 66.6 | 61.6 | 65.2 | 59.2 | 69.2 | 68.8 | 68.1 |
|                 | Benzyl benzoate (C <sub>6</sub> -C <sub>6</sub> ) | 0.0   | 0.0  | 0.0  | 0.0  | 0.0  | 0.0  | 0.0  | 0.0  | 0.0  | 0.0  | 0.0  | 0.0  | 0.0  | 0.0  | 0.0  | 0.0  |
|                 | Eupatoriochromene                                 | 3.6   | 0.0  | 0.0  | 0.0  | 0.0  | 0.0  | 0.0  | 0.0  | 0.0  | 0.0  | 0.0  | 0.0  | 0.0  | 0.0  | 0.0  | 0.0  |
|                 | Other compounds                                   | 0.0   | 0.0  | 0.0  | 0.0  | 0.0  | 0.0  | 0.0  | 0.0  | 0.0  | 0.0  | 0.0  | 0.0  | 0.0  | 0.0  | 0.0  | 0.0  |
|                 | Acorane                                           | 0.0   | 0.0  | 0.0  | 0.0  | 0.0  | 0.0  | 0.0  | 0.0  | 0.0  | 0.0  | 0.0  | 0.0  | 0.0  | 0.0  | 0.0  | 0.0  |
|                 | Alkylbenzene (C <sub>6</sub> -C <sub>3</sub> )    | 0.0   | 63.6 | 63.4 | 66.7 | 57.8 | 68.4 | 62.7 | 70.5 | 60.5 | 66.6 | 61.6 | 65.2 | 59.2 | 69.2 | 68.8 | 68.1 |
|                 | Aromadendrane                                     | 43.05 | 0.6  | 2.7  | 2.4  | 3.7  | 3.5  | 2.1  | 2.6  | 3.4  | 2.1  | 3.2  | 3.4  | 0    | 1.8  | 1.7  | 2.2  |
|                 | Bergamotane                                       | 0.0   | 0.0  | 0.0  | 0.0  | 0.0  | 0.0  | 0.0  | 0.0  | 0.0  | 0.0  | 0.0  | 0.0  | 0.0  | 0.0  | 0.0  | 0.0  |
|                 | Bicyclgermacrene                                  | 0.0   | 0.0  | 0.0  | 0.0  | 0.0  | 0.0  | 0.0  | 0.0  | 0.0  | 0.0  | 0.0  | 0.0  | 0.0  | 0.0  | 0.0  | 0.0  |
|                 | Bisabolane                                        | 0.0   | 0.0  | 0.0  | 0.0  | 0.0  | 0.0  | 0.0  | 0.0  | 0.0  | 0.0  | 0.0  | 0.0  | 0.0  | 0.0  | 0.0  | 0.0  |
|                 | Bourbonane                                        | 0     | 0.5  | 0.4  | 0.0  | 0.5  | 0.0  | 0.0  | 0.5  | 0.0  | 0.0  | 0.0  | 0.0  | 0.0  | 0.3  | 0.4  | 0.3  |
|                 | Benzyl benzoate (C <sub>6</sub> -C <sub>6</sub> ) | 0.0   | 0.0  | 0.0  | 0.0  | 0.0  | 0.0  | 0.0  | 0.0  | 0.0  | 0.0  | 0.0  | 0.0  | 0.0  | 0.0  | 0.0  | 0.0  |
|                 | Cadinane                                          | 4.35  | 0.0  | 0.0  | 0.0  | 0.2  | 0.0  | 0.0  | 0.0  | 0.8  | 0.0  | 0.0  | 0.0  | 0.0  | 1.1  | 1.1  | 0.6  |
|                 | Carane                                            | 0.0   | 0.0  | 0.0  | 0.0  | 0.0  | 0.0  | 0.0  | 0.0  | 0.0  | 0.0  | 0.0  | 0.0  | 0.0  | 0.0  | 0.0  | 0.0  |
|                 | Caryophyllane                                     | 0.0   | 3.7  | 4.2  | 4.0  | 5.3  | 3.5  | 3.8  | 3.8  | 4.6  | 3.9  | 4.2  | 3.8  | 4.9  | 4.6  | 3.8  | 4.2  |
|                 | Chromane                                          | 3.61  | 0.0  | 0.0  | 0.0  | 0.0  | 0.0  | 0.0  | 0.0  | 0.0  | 0.0  | 0.0  | 0.0  | 0.0  | 0.0  | 0.0  | 0.0  |
|                 | Copaane                                           | 0.0   | 1    | 0.4  | 0.0  | 0.5  | 0.0  | 0.0  | 0.0  | 0.0  | 0.0  | 0.0  | 0.0  | 0.0  | 0.7  | 0.7  | 0.7  |
|                 | Cubebane                                          | 0     | 0.5  | 1.3  | 1.6  | 3.7  | 0.0  | 2.7  | 0.0  | 2.3  | 0.0  | 2.8  | 0.0  | 1.9  | 1.7  | 1.3  | 4.0  |
|                 | Daucane                                           | 0.0   | 0.0  | 0.0  | 0.0  | 0.0  | 0.0  | 0.0  | 0.0  | 0.0  | 0.0  | 0.0  | 0.0  | 0.0  | 0.0  | 0.0  | 0.0  |
|                 | Elemane                                           | 0.0   | 0.0  | 0.0  | 0.0  | 0.0  | 0.0  | 0.0  | 0.0  | 0.0  | 0.0  | 0.0  | 0.0  | 0.0  | 0.0  | 0.0  | 0.0  |
|                 | Eremophilane                                      | 3.88  | 0.0  | 0.0  | 0.0  | 0.0  | 0.0  | 0.0  | 0.0  | 0.0  | 0.0  | 0.0  | 0.0  | 0.0  | 0.0  | 0.0  | 0.0  |
|                 | Eudesmane                                         | 22.89 | 0.0  | 0.0  | 0.0  | 0.0  | 0.0  | 0.0  | 0.0  | 0.0  | 0.0  | 1.3  | 0.0  | 1.5  | 0.0  | 0.0  | 0.0  |
|                 | Farnesane                                         | 0.0   | 0.9  | 0.9  | 0.0  | 1.1  | 0.0  | 3.0  | 0.0  | 0.0  | 0.0  | 0.0  | 3.0  | 2.9  | 0.0  | 0.0  | 0.0  |
|                 | Germacrane                                        | 0.0   | 9.0  | 4.7  | 5.8  | 5.9  | 6.1  | 6.9  | 5    | 7.4  | 5.1  | 6.1  | 5.9  | 5.4  | 4.4  | 4.4  | 1.2  |
|                 | Guiane                                            | 0.0   | 0.0  | 0.0  | 0.0  | 1.6  | 0.0  | 0.0  | 0.0  | 0.0  | 0.0  | 0.0  | 0.0  | 0.0  | 1.9  | 1.1  | 1.6  |
| Hidrocarbonetes | 0.0                                               | 0.0   | 0.0  | 0.0  | 0.0  | 0.0  | 0.0  | 0.0  | 0.0  | 0.0  | 0.0  | 0.0  | 0.0  | 0.0  | 0.0  | 0.0  |      |

|                    |      |      |      |     |      |      |     |     |      |     |     |     |      |     |     |      |
|--------------------|------|------|------|-----|------|------|-----|-----|------|-----|-----|-----|------|-----|-----|------|
| <b>Himalachane</b> | 0.0  | 0.0  | 0.0  | 0.0 | 0.0  | 0.0  | 0.0 | 0.0 | 0.0  | 0.0 | 0.0 | 0.0 | 0.0  | 0.0 | 0.0 | 0.0  |
| <b>Humulane</b>    | 4.15 | 12.4 | 13.7 | 12  | 14.3 | 10.2 | 8.2 | 7.9 | 10.1 | 9.7 | 9.3 | 9.3 | 11.2 | 9.6 | 8.4 | 10.2 |
| <b>Ishwarane</b>   | 10.0 | 3.9  | 4.3  | 3.3 | 1.4  | 2.5  | 4.1 | 2.8 | 3.7  | 5.0 | 4.2 | 3.8 | 6.4  | 1.3 | 3.7 | 1.9  |
| <b>Longifolane</b> | 0.0  | 0.0  | 0.0  | 0.0 | 0.0  | 0.0  | 0.0 | 0.0 | 0.0  | 0.0 | 0.0 | 0.0 | 0.0  | 0.0 | 0.0 | 0.0  |
| <b>Longipinane</b> | 0.0  | 0.0  | 0.0  | 0.0 | 0.0  | 0.0  | 0.0 | 0.0 | 0.0  | 0.0 | 0.0 | 0.0 | 0.0  | 0.0 | 0.0 | 0.0  |
| <b>Menthane</b>    | 0.0  | 0.0  | 0.0  | 0.0 | 0.0  | 0.0  | 0.0 | 0.0 | 0.0  | 0.0 | 0.0 | 0.0 | 0.0  | 0.0 | 0.0 | 0.0  |
| <b>Myrcane</b>     | 1.29 | 0.0  | 0.0  | 0.0 | 0.0  | 0.0  | 0.0 | 0.0 | 0.0  | 0.0 | 0.0 | 0.0 | 0.0  | 0.0 | 0.0 | 0.0  |
| <b>Pinane</b>      | 1.14 | 0.0  | 0.0  | 0.0 | 0.0  | 0.0  | 0.0 | 0.0 | 0.0  | 0.0 | 0.0 | 0.0 | 0.0  | 0.0 | 0.0 | 0.0  |
| <b>Thujopsane</b>  | 0.0  | 0.0  | 0.0  | 0.0 | 0.0  | 0.0  | 0.0 | 0.0 | 0.0  | 0.0 | 0.0 | 0.0 | 0.0  | 0.0 | 0.0 | 0.0  |

**Reference:** RO (Morais et al. 2007); RS1 - 1 to 16 (Schindler et al. 2017); RS2 (Von Poser et al. 1994); RS3 (Péres et al. 2009); RS4 (Sperotto et al. 2013); SC (Chaaban et al. 2018); SP1- 1 and 2 (Andrade et al. 1998); PR1 (Krinski et al. 2016); PR2 (Bernuci et al. 2016); PR3 - 1 and 2 (Krinski et al. 2018); PR4 (Silva et al. 2019); PR5 - 1 and 2 (Quiqui et al. 2019); PR6 (Souza et al. 2020) and; PR7 (Souza et al. 2020).

**Table S3. Continuation**

| C-Skeleton           | Compound                               | RS1 - 16 | RS2    | RS3 | RS4   | SC  | SP1 - 1 | SP1 - 2 | PR1  | PR2 | PR3 - 1 | PR3 - 2 | PR4  | PR5 - 1 | PR5 - 2 | PR6   | PR7  |
|----------------------|----------------------------------------|----------|--------|-----|-------|-----|---------|---------|------|-----|---------|---------|------|---------|---------|-------|------|
| Acorane              | $\alpha$ -Acorenol                     |          |        |     |       |     |         | 0.6     |      |     |         |         |      |         |         |       |      |
| Alkylbenzene (C3-C6) | Dillapiole                             | 64.7     |        |     |       |     |         |         |      |     |         |         |      |         |         |       |      |
| Alkylbenzene (C3-C6) | Eugenol                                |          |        | 0.1 |       |     |         |         |      |     |         |         |      |         |         |       |      |
| Alkylbenzene (C3-C6) | Myristicin                             |          |        |     |       |     |         |         |      |     |         |         |      |         |         | 15.19 |      |
| Aromadendrane        | Aromadendrene                          | 2.1      | 2.2    | 2.7 | 2.92  |     | 2.3     | -       |      |     |         |         |      | 1.44    | 0.37    |       |      |
| Aromadendrane        | $\alpha$ -Gurjunene                    |          | < 0.01 | 0.2 | 0.14  |     |         |         |      |     |         |         |      | 0.54    | 0.44    |       |      |
| Aromadendrane        | Alloaromadendrene                      |          | 7.7    | 3.1 | 3.28  |     | 0.6     | 4.3     |      | 2.3 |         |         |      |         |         |       |      |
| Aromadendrane        | $\gamma$ -Gurjunene                    |          |        | 4.3 | 0.23  |     |         |         |      | 2.9 |         |         |      |         |         |       |      |
| Aromadendrane        | $\beta$ -Gurjunene                     |          |        | 0.4 |       |     |         |         |      |     |         |         |      | 4.94    | 5.13    |       |      |
| Aromadendrane        | Spathulenol                            | 1.4      | 0.7    | 1.8 | 1.97  |     | 4.5     | 3.8     |      | 1.4 |         |         |      | 3.2     | 0.82    |       |      |
| Aromadendrane        | <i>allo</i> -Aromadendrene oxide       |          |        |     | 0.00  | 1.1 |         |         |      |     |         |         | 2.47 |         |         |       | 2.47 |
| Aromadendrane        | Ledol                                  |          |        |     | 0.04  |     |         |         |      |     |         |         |      |         |         |       |      |
| Aromadendrane        | Globulol                               |          | 0.5    |     | 0.16  |     | 2.9     | 3.1     | 10.3 |     |         |         |      | 0.1     |         |       |      |
| Aromadendrane        | Viridiflorol                           |          |        | 0.6 | 0.18  |     |         |         |      |     |         |         |      | 0.21    | 0.2     |       |      |
| Bergamotane          | <i>E</i> - $\alpha$ -Bergamotene       |          |        |     | 0.23  |     |         |         |      |     |         |         |      |         |         |       |      |
| Bicyclogermacrane    | Bicyclogermacrene                      |          | 1.2    | 7.4 | 13.16 |     |         |         |      | 4.4 | 5.12    | 6.39    | 2.57 | 4.15    | 4.81    | 4.63  | 2.57 |
| Bisabolane           | $\alpha$ -Zingiberene                  |          |        |     |       | 2.5 |         |         |      |     |         |         |      |         |         |       |      |
| Bisabolane           | $\alpha$ -Santalene                    |          |        |     | 0.33  |     |         |         |      |     |         |         |      |         |         |       |      |
| Bisabolane           | $\beta$ -Santalene                     |          |        |     | 1.08  |     |         |         |      |     |         |         |      |         |         |       |      |
| Bisabolane           | $\gamma$ -Curcumene                    |          |        |     | 0.12  |     |         |         |      |     |         |         |      |         |         |       |      |
| Bisabolane           | $\beta$ -Curcumene                     |          |        |     | 0.52  |     |         |         |      |     |         |         |      |         |         |       |      |
| Bisabolane           | $\gamma$ - <i>E</i> -bisabolene        |          |        |     | 0.21  |     |         |         |      |     |         |         |      |         |         |       |      |
| Bisabolane           | $\alpha$ -Z-Bisaboleno                 |          |        |     |       |     |         |         |      |     |         |         |      |         |         |       |      |
| Bisabolane           | Z-Calamenen-10-ol                      |          |        |     |       | 1.5 |         |         |      |     |         |         |      |         |         |       |      |
| Bisabolane           | <i>E</i> -Calamenen-10-ol              |          |        |     |       | 3.1 |         |         |      |     |         |         |      |         |         |       |      |
| Bisabolane           | $\alpha$ -Bisabolol                    |          |        |     | 0.02  |     |         |         |      |     |         |         |      |         |         |       |      |
| Bisabolane           | Z- $\alpha$ - <i>trans</i> -Bergamotol |          |        |     | 0.09  |     |         |         |      |     |         |         |      |         |         |       |      |
| Bisabolane           | <i>epi</i> - $\alpha$ -bisabolol       |          |        |     |       |     |         |         |      |     |         |         |      | 1.9     | 1.38    |       |      |

|                               |                                              |       |      |      |      |      |      |      |     |      |      |       |      |     |      |      |      |      |       |
|-------------------------------|----------------------------------------------|-------|------|------|------|------|------|------|-----|------|------|-------|------|-----|------|------|------|------|-------|
| Bourbonane                    | $\beta$ -Bourbonene                          | 0.4   | 0.2  |      |      |      |      |      |     |      |      |       |      |     |      |      |      |      |       |
| C <sub>6</sub> C <sub>6</sub> | Benzyl benzoate                              |       |      |      |      |      |      |      |     |      |      | 0.2   | 2.5  |     |      |      |      |      |       |
| Cadinane                      | $\alpha$ -Amorphene                          | 1.2   |      |      |      |      |      |      |     |      |      |       |      |     |      |      |      |      |       |
| Cadinane                      | $\alpha$ -Calacorene                         |       |      |      | 0.1  | 0.16 | 3.5  |      |     |      |      |       | 3.5  | 0.2 | 0.58 | 3.5  |      |      |       |
| Cadinane                      | $\beta$ -Calacorene                          | 1.9   |      |      |      |      |      |      |     |      |      |       |      |     |      |      |      |      |       |
| Cadinane                      | <i>E</i> -Muurolo-3,5-diene                  | 0.06  |      |      |      |      |      |      |     |      |      |       |      |     |      |      |      |      |       |
| Cadinane                      | $\gamma$ -Muurolene                          |       |      |      | 0.85 |      |      |      |     | 2.3  |      |       |      |     | 0.6  | 0.56 |      |      |       |
| Cadinane                      | $\alpha$ -Muurolene                          |       |      |      | 0.3  | 0.73 |      |      |     |      |      | 4.0   |      |     |      |      | 4.98 |      |       |
| Cadinane                      | $\delta$ -Amorphene                          | 0.21  |      |      |      |      |      |      |     |      |      |       |      |     |      |      |      |      |       |
| Cadinane                      | $\gamma$ -Cadinene                           | 0.4   | 0.8  | 1.27 |      |      | 1.1  | 1.6  |     |      |      |       |      | 3.8 | 4.05 |      |      |      |       |
| Cadinane                      | Zonarene                                     | 0.01  |      |      |      |      |      |      |     |      |      |       |      |     |      |      |      |      |       |
| Cadinane                      | $\alpha$ -Cadinene                           |       |      |      | 0.15 |      |      |      |     |      |      |       |      |     | 0.3  | 0.37 |      |      |       |
| Cadinane                      | Cadalene                                     | 33.73 |      |      |      |      |      |      |     |      |      |       |      |     |      |      |      |      |       |
| Cadinane                      | <i>Z</i> -Cadina-1(6),4-diene                |       |      |      |      |      |      |      |     |      |      |       |      |     |      |      | 0.3  | 0.31 |       |
| Cadinane                      | <i>E</i> -Cadina-1,4-diene                   |       |      |      |      |      |      |      |     |      |      |       |      |     |      |      | 0.6  | 0.83 |       |
| Cadinane                      | 1.10-di- <i>epi</i> -cubenol                 |       |      |      | 0.09 |      |      |      |     | 0.3  |      |       |      |     | 0.7  | 0.77 |      |      |       |
| Cadinane                      | $\alpha$ -Muurolol                           |       |      |      | 0.3  | 0.02 |      |      |     |      |      | 1.9   |      |     |      |      | 2.17 |      |       |
| Cadinane                      | $\alpha$ -Cadinol                            | 0.2   |      |      |      | 0.26 | 4.3  | 1.2  | 3.3 |      |      |       |      | 1.3 | 1.31 |      |      |      |       |
| Cadinane                      | 1 - <i>epi</i> -Cubenol                      |       |      |      |      |      | 0.7  |      |     |      |      | 24.22 |      |     |      |      | 1.2  | 1.59 | 25.05 |
| Cadinane                      | <i>epi</i> - $\alpha$ -Cadinol               |       |      |      |      |      | 1.1  |      |     |      |      | 1.6   |      |     |      |      |      |      |       |
| Cadinane                      | <i>epi</i> - $\alpha$ -Muurolol              |       |      |      |      |      | 1.2  |      |     |      |      |       |      |     |      |      | 1.9  | 2.21 |       |
| Cadinane                      | Cubebol                                      | 1.5   |      |      |      |      |      |      |     |      |      |       |      |     |      |      |      |      |       |
| Carane                        | $\delta$ -2-Carene                           | 0.1   |      |      |      |      |      |      |     |      |      |       |      |     |      |      |      |      |       |
| Carane                        | <i>p</i> -Cymene                             | 0.1   |      |      |      |      |      |      |     |      |      |       |      |     |      |      |      |      |       |
| Carane                        | $\delta$ -3-Carene                           | 0.1   |      |      |      |      |      |      |     |      |      |       |      |     |      |      |      |      |       |
| Caryophyllane                 | <i>E</i> -Caryophyllene                      | 4.3   | 17.4 | 8.9  | 7.51 | 3.7  | 12.1 | 19.3 | 1.7 |      | 4.31 | 17.84 | 3.75 | 7.4 | 7.25 | 3.71 | 3.75 |      |       |
| Caryophyllane                 | <i>Z</i> -Cariophyllene                      | 5.2   |      |      |      |      |      |      |     |      |      |       |      |     |      |      |      |      |       |
| Caryophyllane                 | Caryophyllene oxide                          | 0.7   | 1.6  | 0.01 |      |      |      |      |     |      |      |       |      |     | 1.96 | 3.1  | 3.69 | 1.96 |       |
| Caryophyllane                 | Caryophylla-4(14),8(15)-dien-5- $\alpha$ -ol | 0.15  |      |      |      |      |      |      |     |      |      |       |      |     |      |      |      |      |       |
| Caryophyllane                 | Caryophile-4(12),8(13)-dien-5 $\beta$ -ol    |       |      |      |      |      |      |      |     |      |      |       |      |     |      | 0.2  |      | 1.2  |       |
| Copaane                       | $\alpha$ -Copaene                            | 0.4   | 0.5  | 0.5  | 0.01 | 4.3  | 0.5  |      |     | 4.36 |      |       |      |     | 3.2  | 4.36 |      |      |       |
| Copaane                       | $\beta$ -copaene                             | 0.2   |      |      |      |      |      |      |     |      |      |       |      |     |      |      |      |      |       |

|              |                                                   |      |      |       |      |      |      |      |      |      |      |      |      |      |      |
|--------------|---------------------------------------------------|------|------|-------|------|------|------|------|------|------|------|------|------|------|------|
| Copaane      | $\alpha$ -Ylangene                                | tr   |      |       |      |      |      |      |      |      |      |      |      |      |      |
| Copaane      | $\beta$ -Copaen-4- $\alpha$ -ol                   | 2    |      |       |      |      |      |      |      |      |      |      |      |      |      |
| Copaane      | $\beta$ -Copaen-4- $\alpha$ -ol                   | 2.06 |      |       |      |      |      |      |      |      |      | 2.06 | 2.06 |      |      |
| Copaane      | $\alpha$ -Copaen-11-ol                            |      |      |       |      |      |      |      |      |      |      | 0.2  | 0.14 |      |      |
| Cubebane     | $\delta$ -Cadinene                                | 1.5  | 0.8  | 1.2   | 1.47 | 9.3  | 2.4  | 3.5  | 45.3 | 6.86 | 9.39 | 5.6  | 7.12 | 9.39 |      |
| Cubebane     | Amorpha-4.7(11)-diene                             | 2.8  |      |       |      |      |      |      |      |      |      | 2.86 | 2.86 |      |      |
| Cubebane     | $\alpha$ -Cubebene                                | 0.2  |      |       |      |      |      | 0.2  |      |      |      |      | 0.6  |      |      |
| Daucane      | Dauca-5.8-diene                                   | 2.4  |      |       |      |      |      |      |      |      |      | 5.2  | 6.26 |      |      |
| Elemane      | $\gamma$ -Elemene                                 |      |      |       |      | 0.06 | 6.1  | 5.4  |      |      |      | 5.24 | 5.24 |      |      |
| Elemane      | $\beta$ -Elemene                                  | tr   |      | 1.7   | 0.71 | 2.1  |      |      | 0.5  | 3.5  | 6.1  |      |      | 6.1  |      |
| Elemane      | $\delta$ -Elemene                                 | 0.2  |      |       |      |      |      |      |      |      |      |      |      |      |      |
| Elemane      | Elemol                                            | 0.1  |      | 0.27  |      |      |      |      |      |      |      |      |      |      |      |
| Elemane      | Shyobunol                                         |      |      |       |      |      |      |      |      |      |      | 1.2  |      |      |      |
| Eremophilane | 4.5-di- <i>epi</i> -Aristolochene                 | 1.2  |      |       |      |      |      |      |      |      |      | 1.27 | 1.27 |      |      |
| Eremophilane | Aristolene                                        | 0.02 |      |       |      |      |      |      |      |      |      |      |      |      |      |
| Eremophilane | 4- <i>epi</i> - <i>cis</i> -dihydro-Agarofuran    |      |      |       |      |      |      |      |      |      |      | 2.99 | 2.99 |      |      |
| Eudesmane    | $\alpha$ -Selinene                                | 2.1  |      | 2.67  |      | 2.9  | 16.6 | 8.9  |      |      |      |      |      |      |      |
| Eudesmane    | $\delta$ -Selinene                                | 0.6  |      |       |      | 1.6  |      |      |      |      |      | 1.65 | 0.3  | 0.36 | 1.65 |
| Eudesmane    | Drima-7.9(11)-diene                               | 0.34 |      |       |      |      |      |      |      |      |      |      |      |      |      |
| Eudesmane    | $\beta$ -Selinene                                 | 2    |      | 4.8   | 3.43 | 15.7 |      |      | 3.7  |      |      |      |      | 0.1  | 0.36 |
| Eudesmane    | 7-Epi- $\alpha$ -Selinene                         | 0.16 |      |       |      | 0.4  |      |      |      |      |      |      |      |      |      |
| Eudesmane    | Selina-3.7(11)-diene                              | 0.5  |      |       |      |      |      |      |      |      |      |      |      |      |      |
| Eudesmane    | Intermedeol                                       | 0.45 |      |       |      |      |      |      |      |      |      |      |      |      |      |
| Eudesmane    | Selin-11-en-4- $\alpha$ -ol                       |      |      |       |      |      |      |      |      |      |      | 1.2  |      |      |      |
| Eudesmane    | 5- <i>epi</i> -7- <i>epi</i> - $\alpha$ -Eudesmol |      |      |       |      |      |      |      |      |      |      | 13.3 |      |      |      |
| Eudesmane    | $\beta$ -Eudesmol                                 | 0.2  |      |       |      |      |      |      |      |      |      | 0.7  | 0.76 |      |      |
| Eudesmane    | Eudesm-7(11)-en-4-ol                              |      |      |       |      |      |      |      |      |      |      | 28.4 |      |      |      |
| Eudesmane    | Rosifoliol                                        |      |      |       |      |      |      |      |      |      |      | 0.5  | 0.51 |      |      |
| Eudesmane    | $\gamma$ -Eudesmol                                |      |      |       |      |      |      |      |      |      |      | 0.6  | 0.61 |      |      |
| Farnesane    | <i>E,E</i> - $\alpha$ -Farnesene                  | tr   |      | 1.31  | 1.9  |      |      |      |      |      |      | 1.92 | 0.3  | 0.48 | 1.92 |
| Farnesane    | <i>E</i> -Nerolidol                               | 4.1  | 22.4 | 22.06 | 3.2  | 2.7  | 2.8  | 4.02 |      | 5.03 | 3.26 | 6.1  | 7.11 | 5.31 | 3.26 |
| Farnesane    | <i>Z,E</i> -Farnesol                              | 0.12 |      |       |      |      |      |      |      |      |      |      |      |      |      |
| Farnesane    | 2-Sesquilavandulol                                |      |      |       |      |      |      | 0.4  | 1.6  |      |      |      |      |      |      |



|                  |                                 |      |      |      |      |      |      |      |      |      |       |      |      |      |       |     |     |
|------------------|---------------------------------|------|------|------|------|------|------|------|------|------|-------|------|------|------|-------|-----|-----|
| Farnesane        | 2-Z-6- <i>E</i> -Farnesol       |      |      |      |      |      |      |      |      |      |       |      |      |      |       |     |     |
| Germacrane       | Germacrene D                    |      | 1.3  | 2.2  | 0.03 |      | 4.7  |      | 1.7  |      | 1.2   | 1.4  | 1.73 |      | 1.2   |     |     |
| Germacrane       | Germacrene B                    | 4.2  |      |      | 0.37 | 21.5 | 1.1  |      |      |      | 21.53 | 0.4  | 0.21 |      | 21.53 |     |     |
| Germacrane       | Hedycaryol                      |      |      |      |      | 1.1  |      |      |      |      |       |      |      |      |       |     |     |
| Germacrane       | Germacrene A                    |      |      | 1.5  | 0.12 |      |      | 0.9  | 2.6  |      |       |      |      |      |       |     |     |
| Guiane           | $\alpha$ -Bulnesene             |      |      |      |      |      |      |      |      |      |       |      |      |      |       |     |     |
| Guiane           | $\alpha$ -Guaiene               |      |      | 0.3  |      |      |      | 8.3  |      |      |       |      |      |      |       |     |     |
| Guiane           | 6.9-Guaiadiene                  |      |      |      |      |      |      |      |      |      |       | 0.2  | 0.18 |      |       |     |     |
| Hidrocarbonetes  | 3Z-hexenol                      |      |      |      |      |      |      |      |      |      |       | 0.3  |      |      |       |     |     |
| Hidrocarbonetes  | 6-Methyl-5-hepten-2-one         |      |      |      |      |      |      |      |      |      |       | 0.8  |      |      |       |     |     |
| Himalachane      | $\alpha$ -Hirnachalene          |      |      |      |      |      |      | 3.2  |      |      |       |      |      |      |       |     |     |
| Humulane         | $\alpha$ -Humulene              | 10.9 | 37.5 | 16.5 | 21.3 | 3.6  | 13.3 | 29.2 | 2.2  |      | 3.7   | 2.3  | 1.4  |      | 3.67  |     |     |
| Humulane         | Epoxy Humulene II               |      |      | 2.5  | 2.3  |      |      | 2.8  |      |      |       | 0.9  | 0.51 |      |       |     |     |
| Humulane         | Humulene oxide                  |      | 1.1  |      |      |      |      |      |      |      |       |      |      |      |       |     |     |
| Ishwarane        | Ishwarene                       | 1.9  |      |      |      |      |      |      |      |      |       |      |      |      |       |     |     |
| Longifolane      | Longifolol                      |      |      |      |      |      |      |      | 1.2  |      |       |      |      |      |       |     |     |
| Longipinane      | Longipinanol                    |      |      |      |      |      |      |      | 19.1 |      |       |      |      |      |       |     |     |
| Menthane         | Limonene                        |      | 0.5  | 0.3  | 0.1  |      | 0.5  | 0.5  |      |      |       | 0.7  |      |      |       |     |     |
| Menthane         | $\alpha$ -Phellandrene          |      |      | 0.1  |      |      |      |      |      |      |       |      |      |      |       |     |     |
| Menthane         | $\alpha$ -Terpinene             |      |      | 0.1  |      |      |      |      |      |      |       |      |      |      |       |     |     |
| Menthane         | $\gamma$ -Terpinene             |      |      | 0.1  |      |      |      |      |      |      |       |      |      |      |       |     |     |
| Menthane         | Terpinolene                     |      |      | 0.1  |      |      |      |      |      |      |       |      |      |      |       |     |     |
| Menthane         | $\alpha$ -Terpineol             |      |      | 0.1  | 0.01 |      |      |      |      |      |       |      |      |      |       |     |     |
| Myrcane          | Myrcene                         |      | 0.3  | 0.2  |      |      |      |      |      |      |       | 0.3  |      |      |       |     |     |
| Myrcane          | Z- $\beta$ -Ocimene             |      | 0.4  |      |      |      |      |      |      |      |       | 0.2  |      |      |       |     |     |
| Myrcane          | <i>E</i> - $\beta$ -Ocimene     |      | 0.6  | 0.2  |      |      |      |      |      |      |       |      |      |      |       |     |     |
| Myrcane          | Linalool                        |      | 4.8  | 0.3  | 0.04 |      |      |      |      |      |       |      |      |      |       |     |     |
| Myrcane          | Geranyl acetate                 |      |      |      |      |      |      |      |      |      |       | 5.3  | 5.7  |      |       |     |     |
| Pinane           | $\alpha$ -Pinene                |      | 2.0  | 1.9  |      | 2.1  |      |      |      | 9.7  | 2.2   | 5.1  |      |      | 2.2   |     |     |
| Pinane           | $\beta$ -Pinene                 |      | 5.6  | 1.2  |      |      |      |      |      | 13.2 |       | 6.6  |      |      |       |     |     |
| Thujopsane       | Z-dihydro-Mayurone              |      |      |      |      | 1.9  |      |      |      |      |       |      |      |      |       |     |     |
| Chemical classes | <b>Monoterpene hydrocarbons</b> | 0.0  | 9.4  | 4.5  | 0.1  | 2.1  | 0.5  | 0.5  | 0.0  | 7.1  | 0.0   | 22.8 | 2.2  | 12.9 | 0.0   | 0.0 | 2.2 |
|                  | <b>Oxygenated monoterpenes</b>  | 0.0  | 4.8  | 0.4  | 0.1  | 0.0  | 0.0  | 0.0  | 0.0  | 0.0  | 0.0   | 0.0  | 0.0  | 5.3  | 5.7   | 0.0 | 0.0 |

|            |                                                   |      |      |      |      |      |      |      |      |      |      |      |      |      |      |      |      |
|------------|---------------------------------------------------|------|------|------|------|------|------|------|------|------|------|------|------|------|------|------|------|
| C-Skeleton | Sesquiterpenes hydrocarbons                       | 25.7 | 73.1 | 58.1 | 65.4 | 76.7 | 72.9 | 78.1 | 8.3  | 72.0 | 50.0 | 24.2 | 69.7 | 47.9 | 47.7 | 8.3  | 69.7 |
|            | Oxygenated sesquiterpenes                         | 1.4  | 7.3  | 29.5 | 28.2 | 12.8 | 16.7 | 17.3 | 42.7 | 11.4 | 30.3 | 5.0  | 12.7 | 24.6 | 25.0 | 58.8 | 12.7 |
|            | Arylpropanoids (C <sub>6</sub> -C <sub>3</sub> )  | 64.7 | 0.0  | 0.1  | 0.0  | 0.0  | 0.0  | 0.0  | 0.0  | 0.0  | 0.0  | 0.0  | 0.0  | 0.0  | 0.0  | 15.2 | 0.0  |
|            | Benzyl benzoate (C <sub>6</sub> -C <sub>6</sub> ) | 0.0  | 0.0  | 0.0  | 0.0  | 0.0  | 0.0  | 0.2  | 0.0  | 2.5  | 0.0  | 0.0  | 0.0  | 0.0  | 0.0  | 0.0  | 0.0  |
|            | Eupatoriochromene                                 | 0.0  | 0.0  | 0.0  | 0.0  | 0.0  | 0.0  | 0.0  | 0.0  | 0.0  | 0.0  | 0.0  | 0.0  | 0.0  | 0.0  | 0.0  | 0.0  |
|            | Other compounds                                   | 0.0  | 5.1  | 0.0  | 0.0  | 7.1  | 0.0  | 0.0  | 0.0  | 0.0  | 0.0  | 0.0  | 0.0  | 0.0  | 1.1  | 0.0  | 0.0  |
|            | Acorane                                           | 0.0  | 0.0  | 0.0  | 0.0  | 0.0  | 0.0  | 0.6  | 0.0  | 0.0  | 0.0  | 0.0  | 0.0  | 0.0  | 0.0  | 0.0  | 0.0  |
|            | Alkylbenzene (C <sub>3</sub> -C <sub>6</sub> )    | 64.7 | 0.0  | 0.1  | 0.0  | 0.0  | 0.0  | 0.0  | 0.0  | 0.0  | 0.0  | 0.0  | 0.0  | 0.0  | 0.0  | 15.2 | 0.0  |
|            | Aromadendrane                                     | 3.5  | 11.1 | 13.1 | 8.9  | 1.1  | 10.3 | 11.2 | 10.3 | 6.6  | 0.0  | 0.0  | 2.5  | 10.4 | 7.0  | 0.0  | 2.5  |
|            | Bergamotane                                       | 0.0  | 0.0  | 0.0  | 0.2  | 0.0  | 0.0  | 0.0  | 0.0  | 0.0  | 0.0  | 0.0  | 0.0  | 0.0  | 0.0  | 0.0  | 0.0  |
|            | Bicyclogermacrene                                 | 0.0  | 1.2  | 7.4  | 13.2 | 0.0  | 0.0  | 0.0  | 0.0  | 4.4  | 5.1  | 6.4  | 2.6  | 4.2  | 4.8  | 4.6  | 2.6  |
|            | Bisabolane                                        | 0.0  | 0.0  | 0.0  | 2.4  | 7.1  | 0.0  | 0.0  | 0.0  | 0.0  | 0.0  | 0.0  | 0.0  | 0.0  | 1.9  | 1.4  | 0.0  |
|            | Bourbonane                                        | 0.4  | 0.0  | 0.2  | 0.0  | 0.0  | 0.0  | 0.0  | 0.0  | 0.0  | 0.0  | 0.0  | 0.0  | 0.0  | 0.0  | 0.0  | 0.0  |
|            | Benzyl benzoate (C <sub>6</sub> -C <sub>6</sub> ) | 0.0  | 0.0  | 0.0  | 0.0  | 0.0  | 0.0  | 0.2  | 0.0  | 2.5  | 0.0  | 0.0  | 0.0  | 0.0  | 0.0  | 0.0  | 0.0  |
|            | Cadinane                                          | 0.0  | 0.6  | 1.5  | 3.8  | 6.6  | 7.3  | 6.5  | 0.0  | 6.4  | 58.0 | 0.0  | 5.5  | 16.8 | 19.7 | 25.1 | 5.5  |
|            | Carane                                            | 0.0  | 0.0  | 0.3  | 0.0  | 0.0  | 0.0  | 0.0  | 0.0  | 7.1  | 0.0  | 0.0  | 0.0  | 0.0  | 0.0  | 0.0  | 0.0  |
|            | Caryophyllane                                     | 4.3  | 18.1 | 10.5 | 7.7  | 8.9  | 12.1 | 19.3 | 0.0  | 1.7  | 4.3  | 17.8 | 5.7  | 10.7 | 12.1 | 3.7  | 5.7  |
|            | Chromane                                          | 0.0  | 0.0  | 0.0  | 0.0  | 0.0  | 0.0  | 0.0  | 0.0  | 0.0  | 0.0  | 0.0  | 0.0  | 0.0  | 0.0  | 0.0  | 0.0  |
|            | Copaane                                           | 0.4  | 0.5  | 0.5  | 0.2  | 6.3  | 0.0  | 0.5  | 0.0  | 0.0  | 2.1  | 0.0  | 6.4  | 3.3  | 0.1  | 0.0  | 6.4  |
|            | Cubebane                                          | 1.5  | 0.8  | 1.4  | 1.5  | 12.1 | 2.4  | 3.7  | 0.0  | 45.3 | 6.9  | 0.0  | 12.3 | 6.2  | 7.1  | 0.0  | 12.3 |
|            | Daucane                                           | 0.0  | 0.0  | 0.0  | 0.0  | 2.4  | 0.0  | 0.0  | 0.0  | 0.0  | 0.0  | 0.0  | 0.0  | 5.2  | 6.3  | 0.0  | 0.0  |
|            | Elemane                                           | 0.0  | 0.0  | 2.0  | 1.0  | 6.1  | 2.1  | 0.5  | 0.0  | 10.1 | 0.0  | 0.0  | 11.3 | 0.0  | 0.0  | 0.0  | 11.3 |
|            | Eremophilane                                      | 0.0  | 0.0  | 0.0  | 0.0  | 1.2  | 0.0  | 0.0  | 0.0  | 0.0  | 0.0  | 0.0  | 3.0  | 0.0  | 0.0  | 0.0  | 3.0  |
|            | Eudesmane                                         | 0.0  | 4.1  | 5.6  | 7.1  | 4.5  | 33.2 | 12.6 | 13.3 | 1.2  | 0.0  | 0.0  | 1.7  | 2.2  | 2.6  | 28.4 | 1.7  |
|            | Farnesane                                         | 0.0  | 4.1  | 22.4 | 23.5 | 5.1  | 3.1  | 4.4  | 0.0  | 0.0  | 4.0  | 5.0  | 5.2  | 6.5  | 7.6  | 5.3  | 5.2  |
|            | Germacrene                                        | 4.2  | 1.3  | 3.7  | 0.5  | 22.6 | 5.8  | 0.9  | 0.0  | 4.3  | 0.0  | 0.0  | 22.7 | 1.8  | 1.9  | 0.0  | 22.7 |
|            | Guiane                                            | 0.0  | 0.0  | 0.3  | 0.0  | 0.0  | 0.0  | 0.0  | 8.3  | 0.0  | 0.0  | 0.0  | 0.0  | 0.2  | 0.2  | 0.0  | 0.0  |
|            | Hidrocarbonetes                                   | 0.0  | 0.0  | 0.0  | 0.0  | 0.0  | 0.0  | 0.0  | 0.0  | 0.0  | 0.0  | 0.0  | 0.0  | 0.0  | 1.1  | 0.0  | 0.0  |
|            | Himalachane                                       | 0.0  | 0.0  | 0.0  | 0.0  | 0.0  | 0.0  | 3.2  | 0.0  | 0.0  | 0.0  | 0.0  | 0.0  | 0.0  | 0.0  | 0.0  | 0.0  |
|            | Humulane                                          | 10.9 | 38.6 | 19.0 | 23.6 | 3.6  | 13.3 | 32.0 | 0.0  | 2.2  | 0.0  | 0.0  | 3.7  | 3.2  | 1.9  | 0.0  | 3.7  |
|            | Ishwarane                                         | 1.9  | 0.0  | 0.0  | 0.0  | 0.0  | 0.0  | 0.0  | 0.0  | 0.0  | 0.0  | 0.0  | 0.0  | 0.0  | 0.0  | 0.0  | 0.0  |
|            | Longifolane                                       | 0.0  | 0.0  | 0.0  | 0.0  | 0.0  | 0.0  | 0.0  | 0.0  | 0.0  | 1.2  | 0.0  | 0.0  | 0.0  | 0.0  | 0.0  | 0.0  |
|            | Longipinane                                       | 0.0  | 0.0  | 0.0  | 0.0  | 0.0  | 0.0  | 0.0  | 19.1 | 0.0  | 0.0  | 0.0  | 0.0  | 0.0  | 0.0  | 0.0  | 0.0  |

|                   |     |     |     |     |     |     |     |     |     |     |      |     |      |     |     |     |     |
|-------------------|-----|-----|-----|-----|-----|-----|-----|-----|-----|-----|------|-----|------|-----|-----|-----|-----|
| <b>Menthane</b>   | 0.0 | 0.5 | 0.8 | 0.1 | 0.0 | 0.5 | 0.5 | 0.0 | 0.0 | 0.0 | 0.0  | 0.0 | 0.0  | 0.7 | 0.0 | 0.0 | 0.0 |
| <b>Myrcane</b>    | 0.0 | 6.1 | 0.7 | 0.0 | 0.0 | 0.0 | 0.0 | 0.0 | 0.0 | 0.0 | 0.0  | 0.0 | 0.0  | 5.8 | 5.7 | 0.0 | 0.0 |
| <b>Pinane</b>     | 0.0 | 7.6 | 3.1 | 0.0 | 2.1 | 0.0 | 0.0 | 0.0 | 0.0 | 0.0 | 22.8 | 2.2 | 11.7 | 0.0 | 0.0 | 0.0 | 2.2 |
| <b>Thujopsane</b> | 0.0 | 0.0 | 0.0 | 0.0 | 1.9 | 0.0 | 0.0 | 0.0 | 0.0 | 0.0 | 0.0  | 0.0 | 0.0  | 0.0 | 0.0 | 0.0 | 0.0 |

**Reference:** RO (Morais et al. 2007); RS1 - 1 to 16 (Schindler et al. 2017); RS2 (Von Poser et al. 1994); RS3 (Péres et al. 2009); RS4 (Sperotto et al. 2013); SC (Chaaban et al. 2018); SP1- 1 and 2 (Andrade et al. 1998); PR1 (Krinski et al. 2016); PR2 (Bernuci et al. 2016); PR3 - 1 and 2 (Krinski et al. 2018); PR4 (Silva et al. 2019); PR5 - 1 and 2 (Quiqui et al. 2019); PR6 (Souza et al. 2020) and; PR7 (Souza et al. 2020).

**Scheme S1.** Biosynthetic map of terpene carbon skeleton types based on essential oils from leaves of from *Piper gaudichaudianum* Kunth of this study and database from literature.

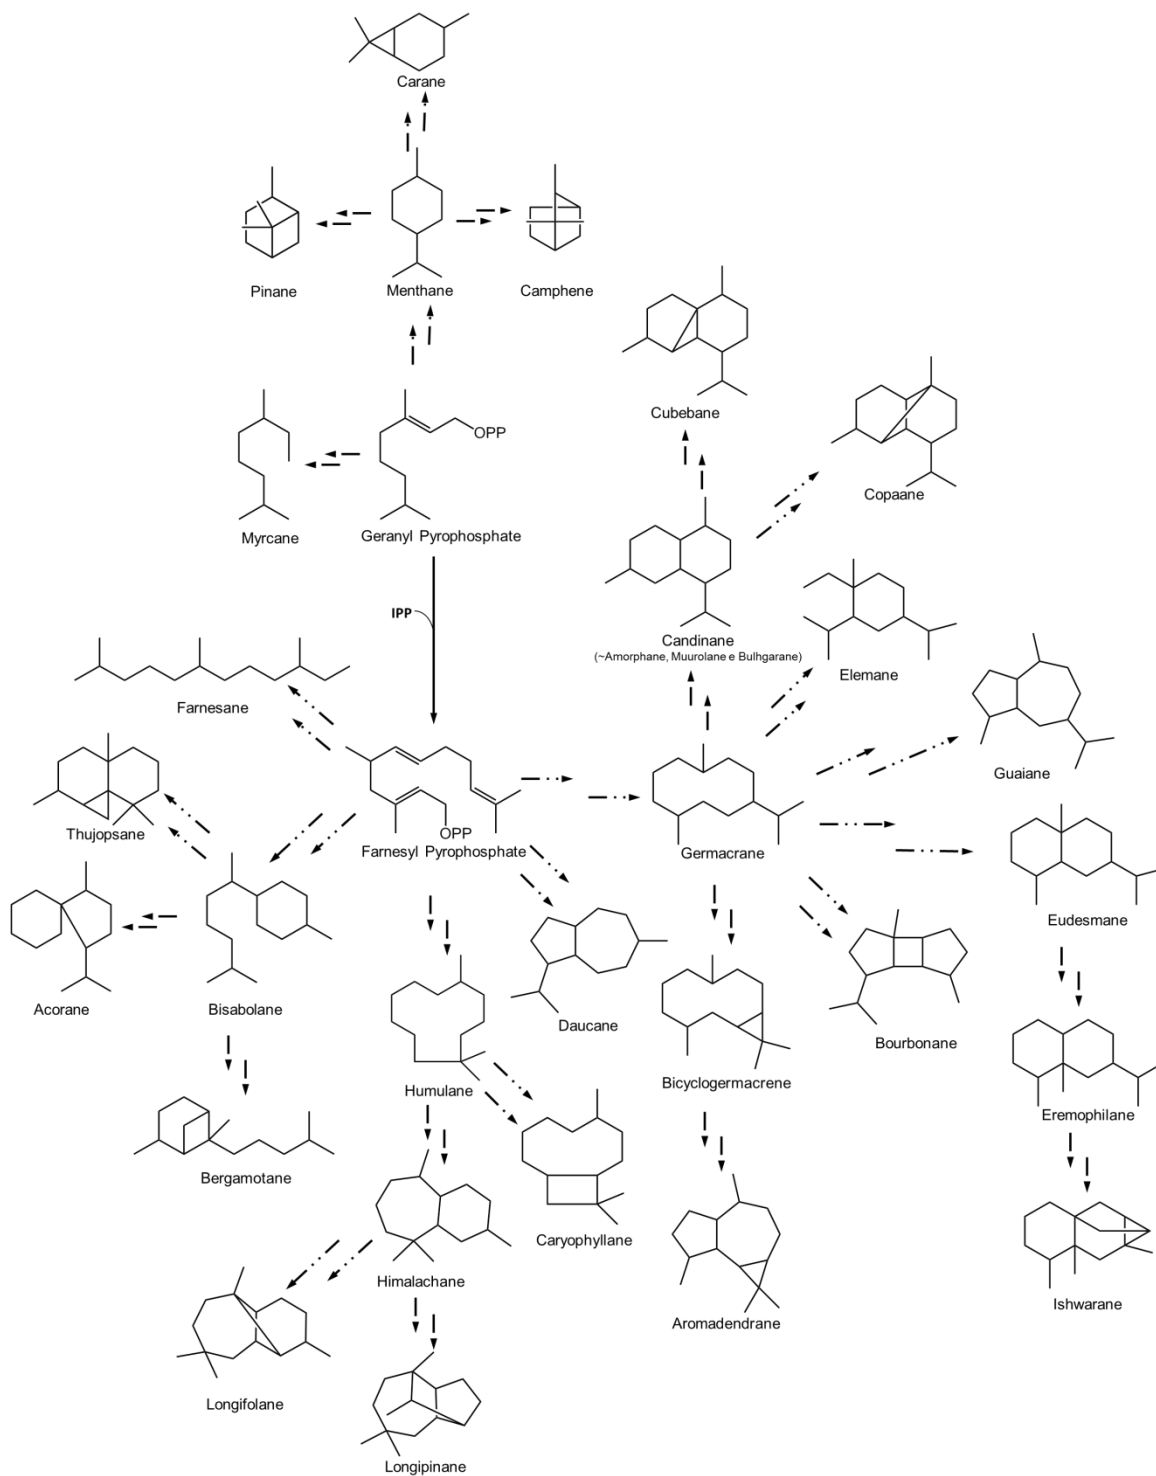

Reference: RO (Morais et al. 2007); RS1 - 1 to 16 (Schindler et al. 2017); RS2 (Von Poser et al. 1994); RS3 (Péres et al. 2009); RS4 (Sperotto et al. 2013); SC (Chaaban et al. 2018); SP1- 1 and 2 (Andrade et al. 1998); PR1 (Krinski et al. 2016); PR2 (Bernuci et al. 2016); PR3 - 1 and 2 (Krinski et al. 2018); PR4 (Silva et al. 2019); PR5 - 1 and 2 (Quiqui et al. 2019); PR6 (Souza et al. 2020) and; PR7 (Souza et al. 2020). Double arrows indicate

that some steps are missed in the diagram. Broken line arrows represent a theoretical biosynthetic path that may or may not be active. Whole unbroken arrow represents a well established primary biosynthetic pathway.

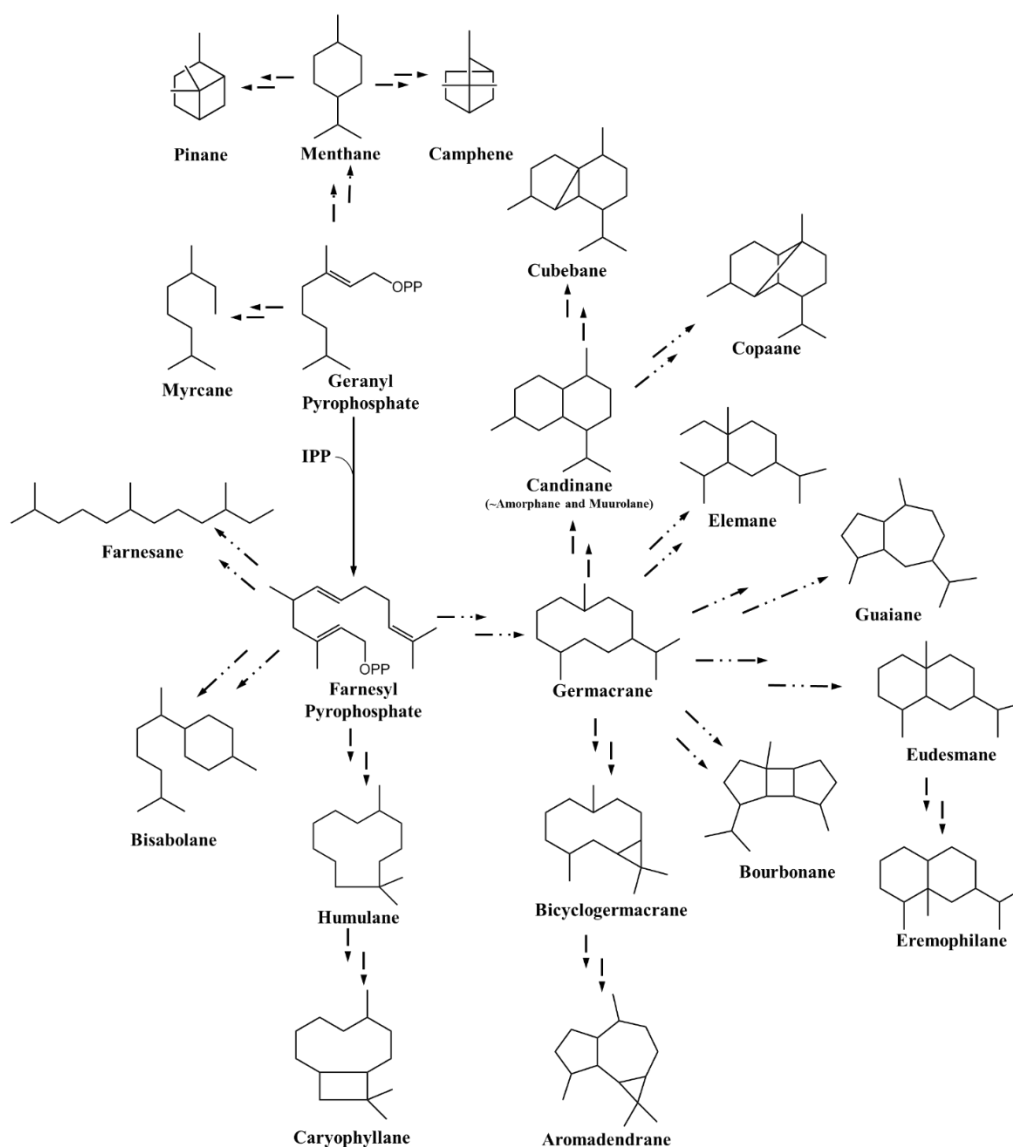

**Scheme S2.** Biosynthetic map of terpene carbon skeleton types based on the essential oils compounds from leaves of *Piper gaudichaudianum* Kunth (Piperaceae) for seasonality studies. Double arrows indicate that some steps are missed in the diagram. Broken line arrows represent a theoretical biosynthetic path that may or may not be active. Whole unbroken arrow represents a well established primary biosynthetic pathway.

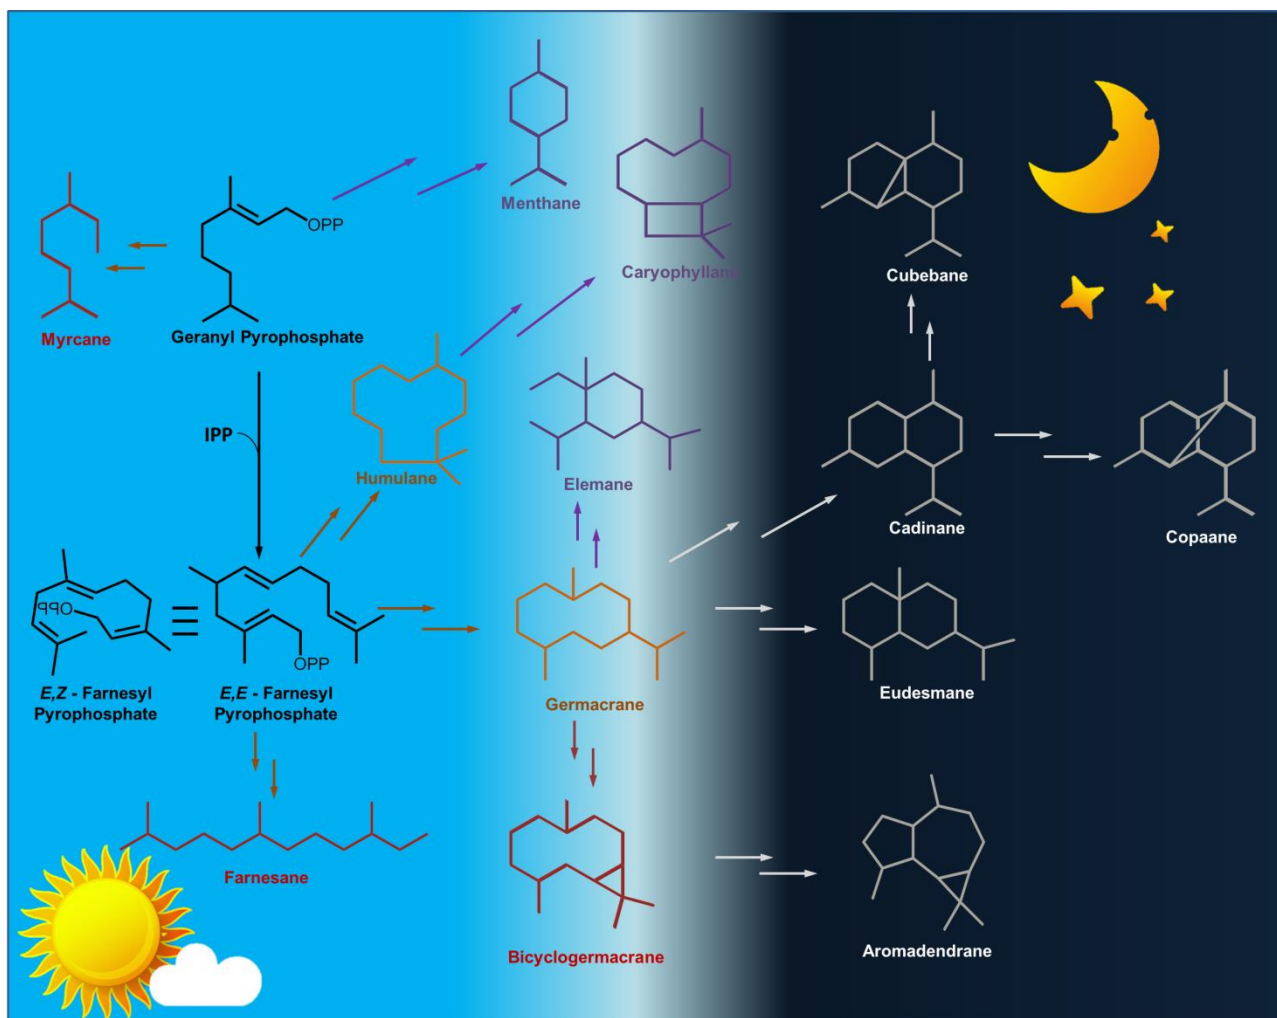

**Scheme S3.** Biosynthetic map of terpene carbon skeleton types based on the essential oils compounds from leaves of *Piper gaudichaudianum* Kunth (Piperaceae) for circadian rhythm studies.

|                                                                                                                                                                    |                                                                                                                                                                       |                                                                                                                                                          |                                                                                                                                                            |                                                                                                                                                                    |
|--------------------------------------------------------------------------------------------------------------------------------------------------------------------|-----------------------------------------------------------------------------------------------------------------------------------------------------------------------|----------------------------------------------------------------------------------------------------------------------------------------------------------|------------------------------------------------------------------------------------------------------------------------------------------------------------|--------------------------------------------------------------------------------------------------------------------------------------------------------------------|
| <b>1</b><br>$\alpha$ - Pinene<br>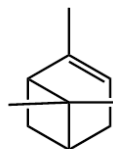<br>$N_{ox} = -16 \text{ OS} = 0$                | <b>2</b><br>$\beta$ - Pinene<br><br>$N_{ox} = -16 \text{ OS} = 0$                    | <b>3</b><br>Camphene<br><br>$N_{ox} = -16 \text{ OS} = 0$               | <b>4</b><br>Myrcene<br><br>$N_{ox} = -16 \text{ OS} = 0$                 | <b>5</b><br>Limonene<br><br>$N_{ox} = -16 \text{ OS} = 0$                       |
| <b>6</b><br><i>cis</i> -Linalool<br>oxide<br><br>$N_{ox} = -15 \text{ OS} = 0,5$  | <b>7</b><br>Linalool<br><br>$N_{ox} = -16 \text{ OS} = 0$                            | <b>8</b><br>1-Terpineol<br><br>$N_{ox} = -16 \text{ OS} = 0$            | <b>9</b><br>Camphor<br><br>$N_{ox} = -14 \text{ OS} = 2$                 | <b>10</b><br>Camphene<br>hydrate<br><br>$N_{ox} = -16 \text{ OS} = 0$           |
| <b>11</b><br>$\alpha$ -Terpineol<br><br>$N_{ox} = -16 \text{ OS} = 0$            | <b>12</b><br>Borneol<br><br>$N_{ox} = -16 \text{ OS} = 0$                          | <b>13</b><br>Bornyl<br>acetate<br><br>$N_{ox} = -14 \text{ OS} = 1$   | <b>14</b><br>Neryl<br>acetate<br><br>$N_{ox} = -16 \text{ OS} = 0$     | <b>15</b><br>(Z)- $\beta$ -<br>Farnesene<br><br>$N_{ox} = -24 \text{ OS} = 0$ |
| <b>16</b><br><i>E</i> - $\beta$ -Farnesene<br><br>$N_{ox} = -24 \text{ OS} = 0$ | <b>17</b><br><i>E,E</i> - $\alpha$ -Farnesene<br><br>$N_{ox} = -24 \text{ OS} = 0$ | <b>18</b><br>$\beta$ -Bisabolene<br><br>$N_{ox} = -24 \text{ OS} = 0$ | <b>19</b><br><i>E</i> -Nerolidol<br><br>$N_{ox} = -24 \text{ OS} = 0$ |                                                                                                                                                                    |

**Figure S1.** Continuation

**20****Z-Nerolidol**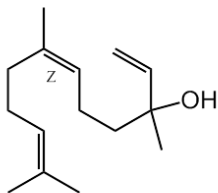 $N_{ox} = -24 \text{ OS} = 0$ **21****iso-Caryophyllene**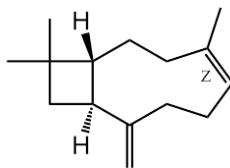 $N_{ox} = -24 \text{ OS} = 0$ **22****E-Caryophyllene**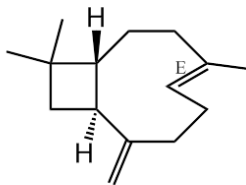 $N_{ox} = -24 \text{ OS} = 0$ **23** **$\beta$ -Humulene**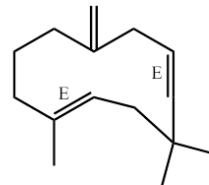 $N_{ox} = -24 \text{ OS} = 0$ **24** **$\alpha$ -Humulene**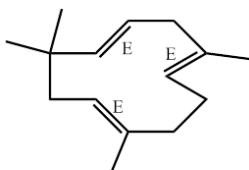 $N_{ox} = -24 \text{ OS} = 0$ **25****9-*epi*-E-Caryophyllene**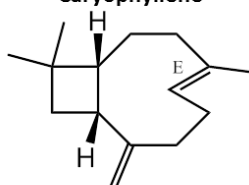 $N_{ox} = -24 \text{ OS} = 0$ **26****Humulene epoxide II**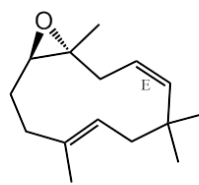 $N_{ox} = -23 \text{ OS} = 0,5$ **27****Caryophylla-4(12),8(13)-dien-5 $\alpha$ -ol**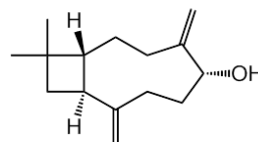 $N_{ox} = -22 \text{ OS} = 1$ **28****14-hydroxy-Z-Caryophyllene**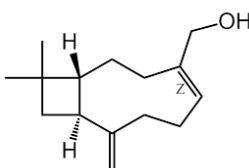 $N_{ox} = -22 \text{ OS} = 1$ **29****14-hydroxy-9-*epi*-E-Caryophyllene**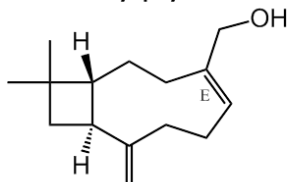 $N_{ox} = -22 \text{ OS} = 1$ **30****Caryophyllene acetate**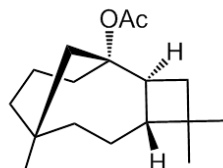 $N_{ox} = -22 \text{ OS} = 1$ **31****Caryophyllene oxide**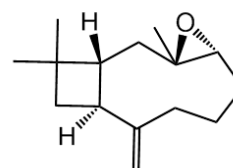 $N_{ox} = -22 \text{ OS} = 1$ **32****Germacrene D**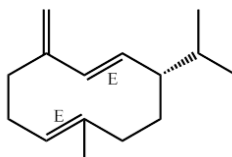 $N_{ox} = -24 \text{ OS} = 0$ **33****Germacrene B**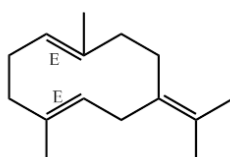 $N_{ox} = -24 \text{ OS} = 0$ **34****Bicyclogermacrene**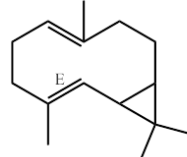 $N_{ox} = -24 \text{ OS} = 0$ **35** **$\alpha$ -Gurjunene**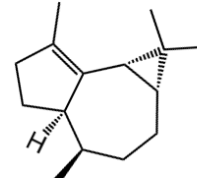 $N_{ox} = -24 \text{ OS} = 0$



Figure S1. Continuation

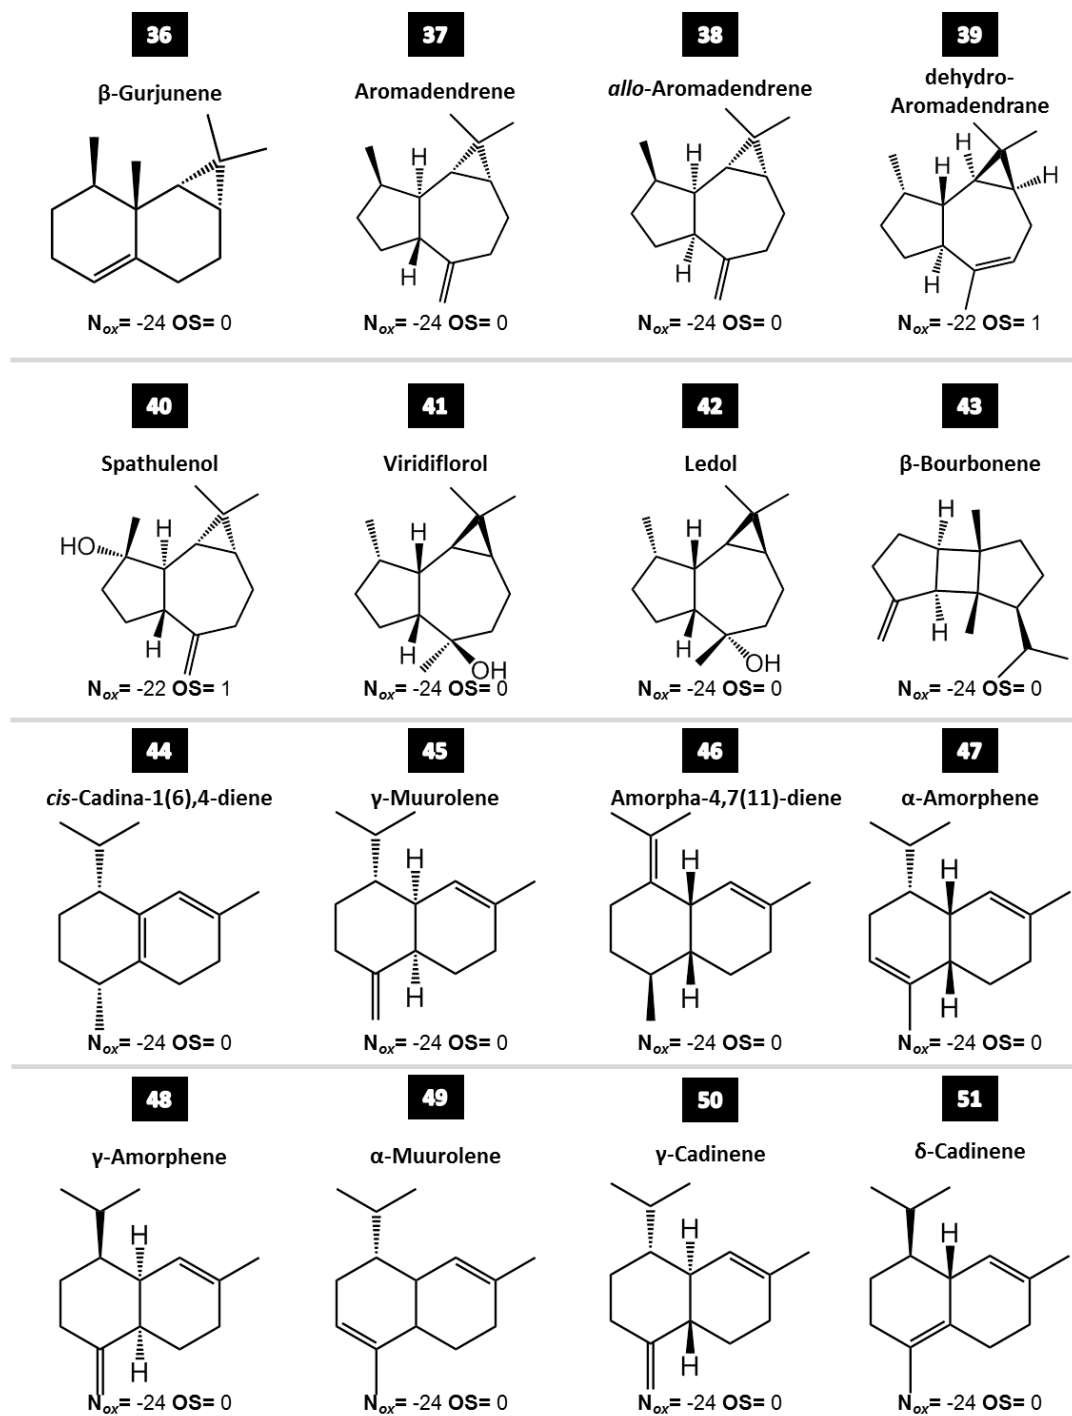

Figure S1. Continuation

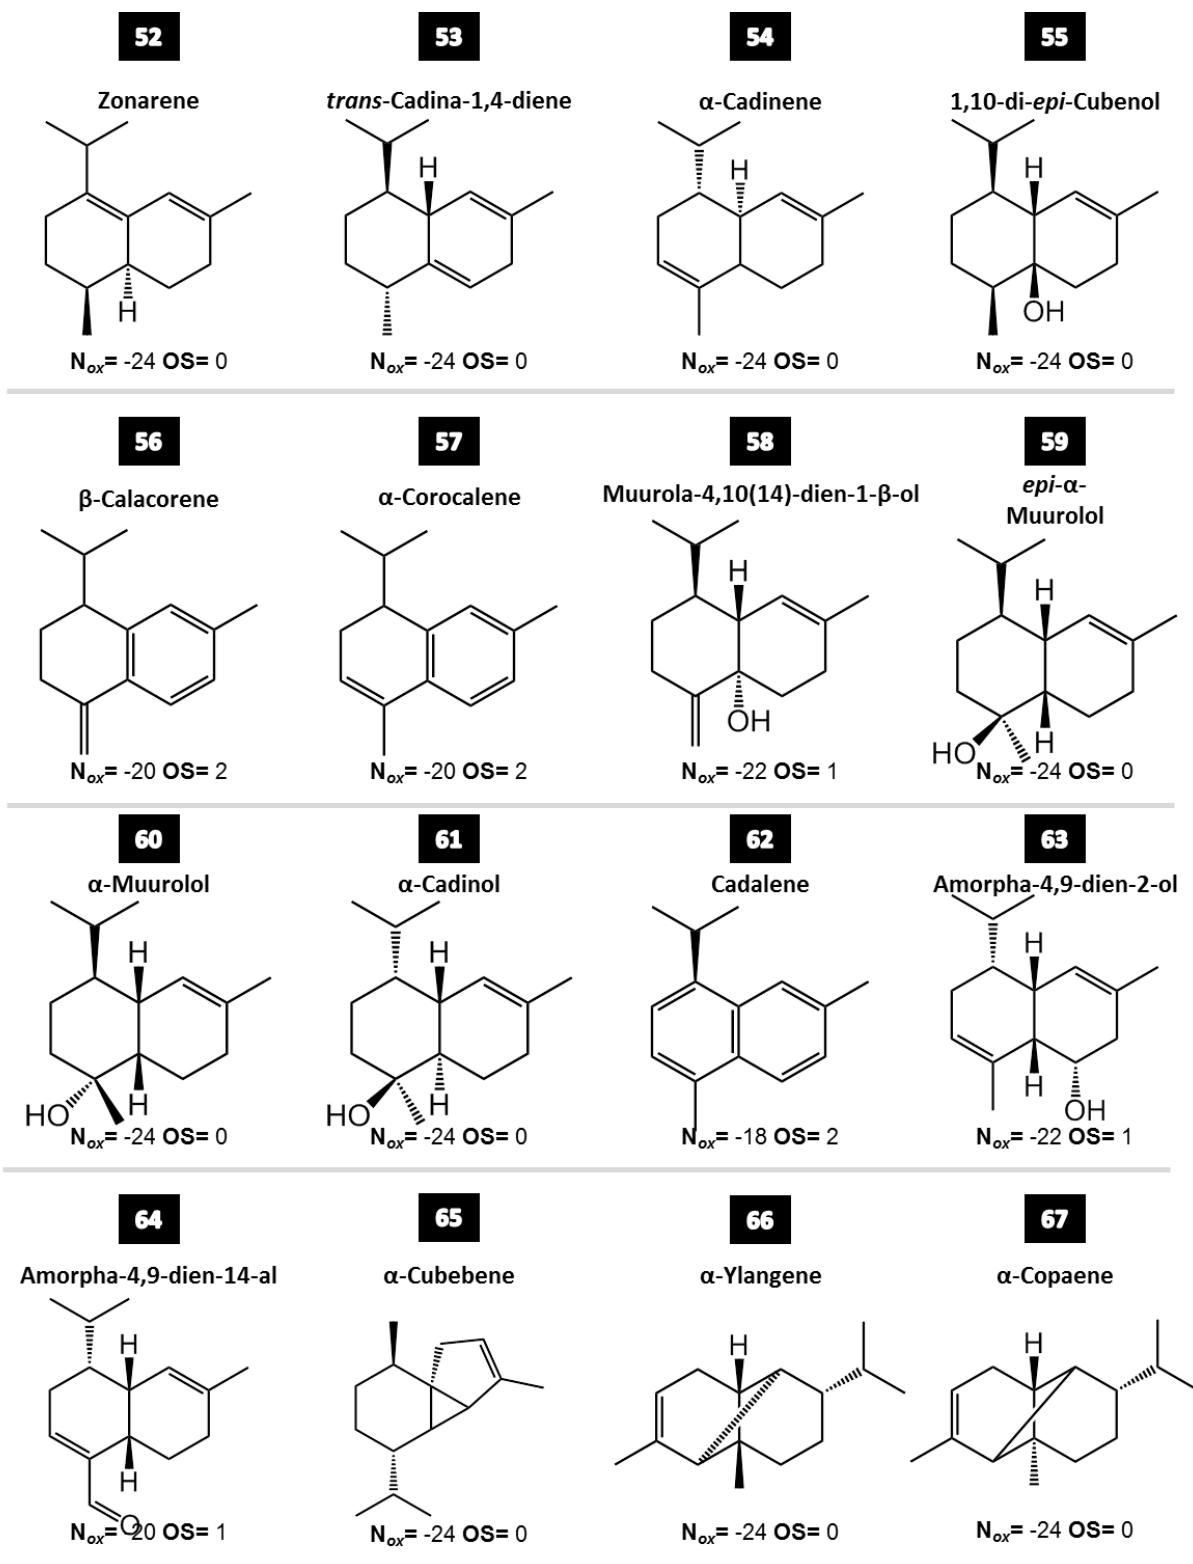

**Figure S1.** Continuation

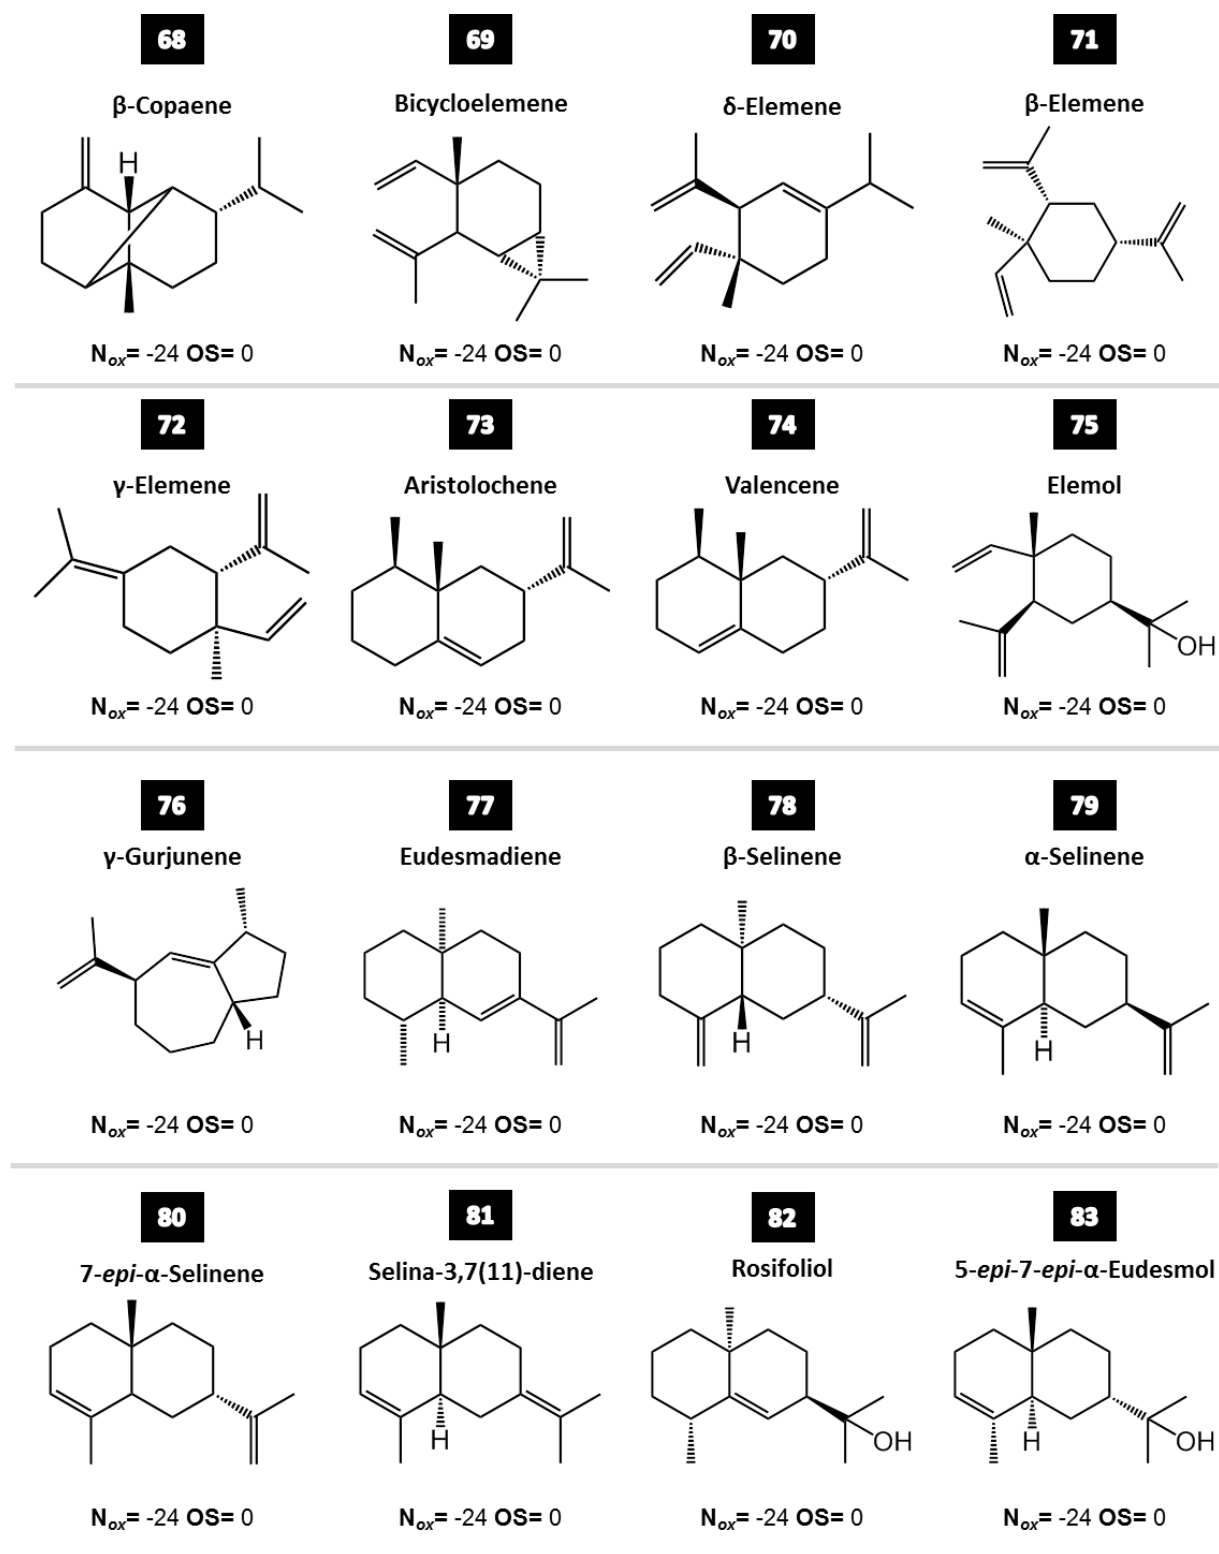

Figure S1. Continuation

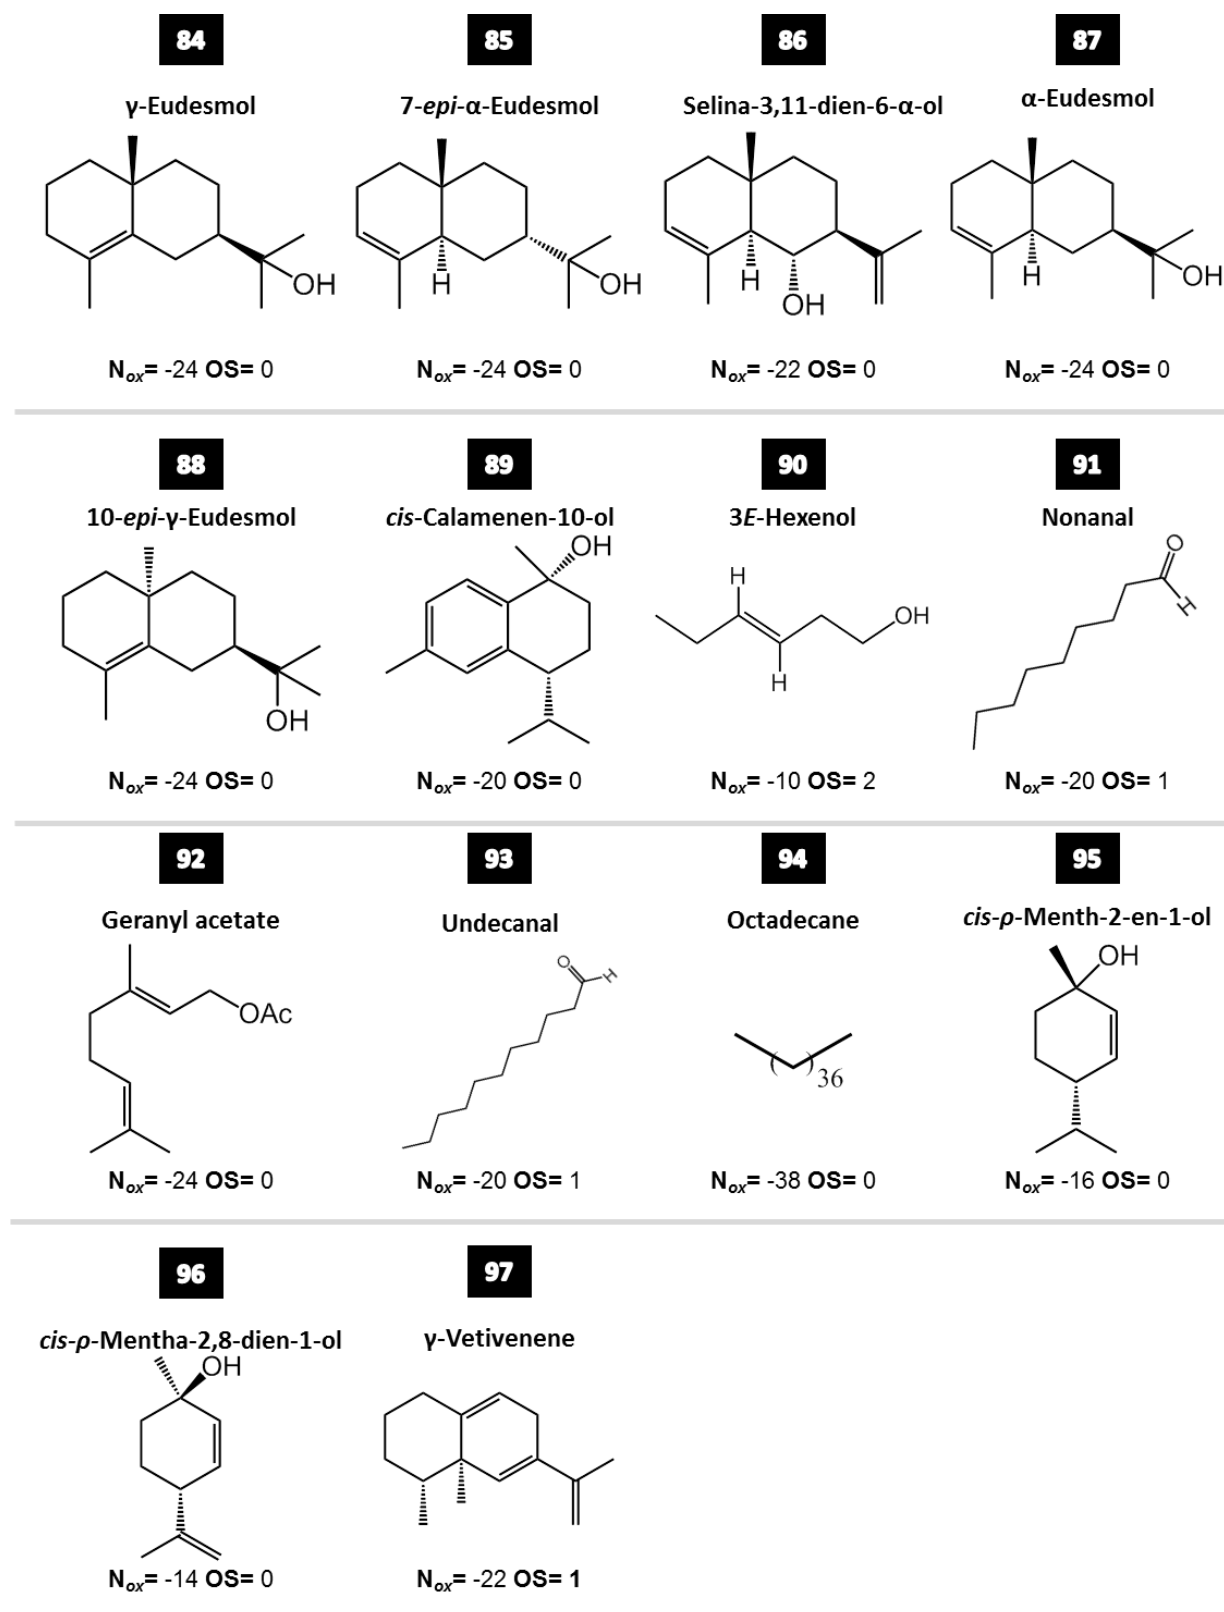

Figure S1. Structures of terpenic derivatives (monoterpenoids and sesquiterpenes) and non-terpenic

hydrocarbons identified in the essential oils of *Piper gaudichaudianum* Kunth with their respective oxidation numbers ( $N_{OX}$ ) and the values of the oxidation steps (OS) of terpene-type chemical precursors.

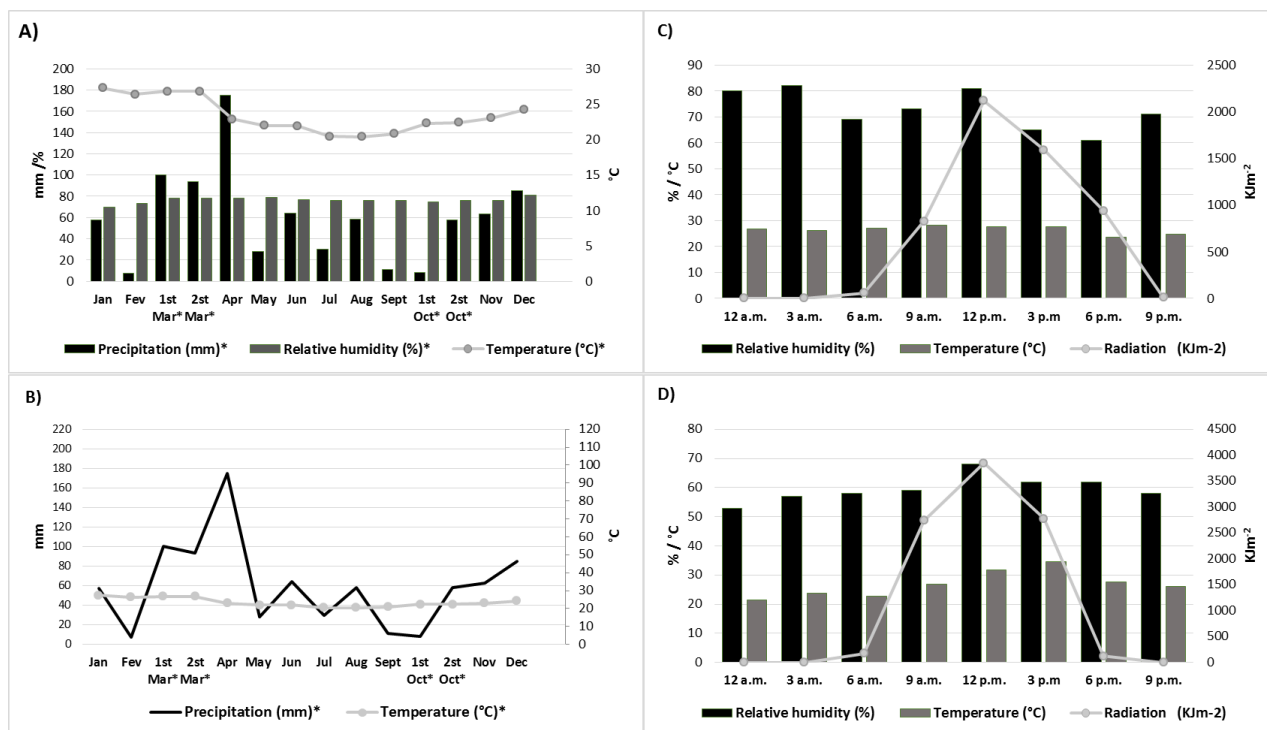

**Figure S2.** Climatic data of Rio de Janeiro City (Brazil) during the collections of *Piper gaudichaudianum* Kunth leaves. Data collected from reference INMET (2020). Monthly averages of temperature, precipitation, and relative humidity from January to December 2017 (A). Ombrothermal diagram from January to December 2017 (B). Data of temperature, relative humidity, and radiation from the leaves' collection time for the circadian study in March (C) and October 2017 (D).
